# Supplementary material for: Changing Epidemiology of Human Brucellosis, China, 1955–2014
Source: PubMed Central journal article supplement (PMC5324817; doi:10.3201/eid2302.151710), 2017-02
Supplement: 15-1710-Techapp-s1.pdf [file 15-1710-Techapp-s1.pdf]

# Changing Epidemiology of Human Brucellosis, China, 1955–2014

## Technical Appendix

**Technical Appendix Table 1.** Summary of laws or regulations related to brucellosis surveillance and control, China, 1955–2014\*

| No | Title                                                          | Approved by                                                                                              | Issued by                                                                   | Period enforced                                                       | Note                                                                                                                                                                                            |
|----|----------------------------------------------------------------|----------------------------------------------------------------------------------------------------------|-----------------------------------------------------------------------------|-----------------------------------------------------------------------|-------------------------------------------------------------------------------------------------------------------------------------------------------------------------------------------------|
| 1  | The Administrative Measures of Infectious Disease              | The State Council, PRC, on 1955 Jun 1                                                                    | The Ministry of Health, PRC on 1955 Jul 5                                   | 1955 Jul 5–1978 Sep 19                                                | Undulant fever (brucellosis) was 1 of the 18 notifiable infectious diseases                                                                                                                     |
| 2  | The National Programme of Agricultural Development (1956–1967) | The National People's Congress, PRC, on 1960 Apr 10 (proposed on 1956 Jan 23)                            | The National People's Congress, PRC on 1960 Apr 10                          | 1956–1967                                                             | Brucellosis was 1 of diseases for control and elimination, targeted by the Leading Group of Endemic Diseases Prevention and Control in Northern, the CPC Central Committee, established in 1960 |
| 3  | The Administrative Regulation of Acute Infectious Disease      | The State Council, PRC                                                                                   | The Ministry of Health, PRC on 1978 Sep 20                                  | 1978 Sep 20                                                           | Brucellosis was 1 of the 25 notifiable infectious diseases                                                                                                                                      |
| 4  | The Tentative Measures of Brucellosis Control and Prevention   | The State Council, PRC on 1979 Dec 22                                                                    | The Ministry of Health and the Ministry of Agriculture, PRC, on 1980 Jan 31 | 1980 Mar 1–current                                                    |                                                                                                                                                                                                 |
| 5  | The Law on Infectious Disease Control and Prevention           | The Standing Committee of the National People's Congress, PRC, on 1989 Feb 21 and revised on 2004 Aug 28 | The National                                                                | 1989 Sep 1–2004 Nov 30; the revised version during 2004 Dec 1–current | Brucellosis was 1 of the 35 notifiable infectious diseases and listed in Category B (the revised version comprised 37 notifiable diseases)                                                      |

|    |                                                                                                        |                                                                                                                                                        |                                                                                          |                                                                       |                                                                                           |
|----|--------------------------------------------------------------------------------------------------------|--------------------------------------------------------------------------------------------------------------------------------------------------------|------------------------------------------------------------------------------------------|-----------------------------------------------------------------------|-------------------------------------------------------------------------------------------|
| 6  | The Implementing Measures of the Law on Prevention and Control of Infectious Diseases                  | The State Council, PRC, on 1991 Oct 4                                                                                                                  | The Ministry of Health, PRC, on 1991 Dec 6                                               | 1991 Dec 6–current                                                    | Brucellosis was listed as the Category B of pathogens for storage, carrying and transport |
| 7  | The Regulation on Disease Prevention and Control of Livestock and Poultry                              | The State Council, PRC, on 1985 Feb 14                                                                                                                 | The State Council, PRC, on 1985 Jul 1                                                    | 1985 Jul 1–1997 Dec 31                                                | Brucellosis was 1 of the Category B animal diseases                                       |
| 8  | The Implementing Measures of the Regulation on Disease Prevention and Control of Livestock and Poultry | The Ministry of Agriculture, PRC, on 1985 Aug 7; the revised version approved by the 6th Standing Meeting of the Ministry of Agriculture, PRC, in 1991 | The Ministry of Agriculture, PRC, on 1985 Aug 7 and revised version issued on 1992 Apr 8 | 1985 Aug 7–1992 Apr 7; the revised version during 1997 Apr 8–Dec 31   |                                                                                           |
| 9  | The Law on Disease Prevention and Control of Livestock and Poultry                                     | The Standing Committee of the National People's Congress, PRC, on 1997 Jul 3 and revised on 2007 Aug 30                                                |                                                                                          | 1998 Jan 1–2007 Dec 31; the revised version during 2008 Jan 1–current |                                                                                           |
| 10 | The National Mid- and Long-term Plan of Animal Disease Control and Prevention, 2012–2020               | The General Office of State Council, PRC, on 2012 May 20                                                                                               |                                                                                          |                                                                       | Brucellosis was 1 of 16 prior domestic animal diseases for control                        |

\*CPC, Communist Party of China; PRC, People's Republic of China.

**Technical Appendix Table 2.** Variables in the aggregated dataset of human brucellosis cases, by year, China, 1955–2003

| Variables*                                            | Aggregated                                                                                | Period    |
|-------------------------------------------------------|-------------------------------------------------------------------------------------------|-----------|
| Total cases and no. fatalities                        | By month at national level                                                                | 1955–2003 |
|                                                       | By province                                                                               | 1955–2003 |
|                                                       | By province and month                                                                     | 1980–2003 |
|                                                       | By patient sex                                                                            | 1988–1997 |
|                                                       |                                                                                           | 1999–2003 |
|                                                       | By age group (each year <10 years of age, each 5-year from 10 to 85 years, and ≥85 years) | 1988–1997 |
|                                                       |                                                                                           | 1999–2003 |
| Incidence rate and death rate (per 100,000 residents) | By occupation                                                                             | 1992–2003 |
|                                                       | At national level                                                                         | 1955–2003 |
| The case-fatality rate                                | By province                                                                               | 1955–2003 |
|                                                       | At national level                                                                         | 1980–2003 |
| No. counties with cases                               | At national level                                                                         | 1994–2003 |
| No. cases imported from other province                | At national level                                                                         | 1997–2003 |

\*The data were aggregated and reported monthly by each province in mainland China, 1955 – 2003.

**Technical Appendix Table 3.** Variables in the individual dataset of human brucellosis cases, mainland China, 2004–2014

| Variable*                   | Definition/classification                                                                                                                                                           | Completeness   |
|-----------------------------|-------------------------------------------------------------------------------------------------------------------------------------------------------------------------------------|----------------|
| Identification              | A unique 8-digital number for each case.                                                                                                                                            | 100% reported  |
| Sex                         | Male and female                                                                                                                                                                     | 100% reported  |
| Age                         | Interval from the date of birth to date of onset                                                                                                                                    | 100% reported  |
| Zone code of address        | Unique 6-digital number at county level                                                                                                                                             | 100% reported  |
| Indigenous or imported case | 1. Reported by the same county<br>2. Imported from other county in the same prefecture<br>3. Imported from other prefecture in the same province<br>4. Imported from other province | 100% reported  |
| Nationality                 | Chinese or foreigner                                                                                                                                                                | 100% reported  |
| Occupation                  | Occupation/status of case-patients                                                                                                                                                  | 99.5% reported |
| Type of diagnosis           | Probable case (clinical diagnosed case)<br>Confirmed case (laboratory-confirmed case)                                                                                               | 100% reported  |
| Date of onset               | Date of illness onset                                                                                                                                                               | 100% reported  |
| Date of diagnosis           | Date of diagnosis as a probable or confirmed case                                                                                                                                   | 100% reported  |
| Date of report              | First date of reporting to dengue surveillance system                                                                                                                               | 100% reported  |
| Date of death               | Date of case-patient death, if applicable.                                                                                                                                          | 100% reported  |

\*The data were reported by doctors within 24 hours after diagnosis to the online national Notifiable Infectious Disease Reporting Information System (NIDRIS) since 2004. NIDRIS enables all the healthcare institutes across the country to report individual cases of human brucellosis rapidly through the Internet to the data center located in the Chinese Center for Disease Control and Prevention.

**Technical Appendix Table 4.** Summary of diagnosis criteria and classification for human brucellosis, mainland China\*

| Variable               | 1977 Sep–1988 Sep                                                                                                                                                                                                                | 1988 Oct–1996 Jun                                                                                                                                                                                    | 1996 Jul–2007 Oct                                                                                                                                                                                                                                                    | 2007 Oct–current                                                                                                                                                                |
|------------------------|----------------------------------------------------------------------------------------------------------------------------------------------------------------------------------------------------------------------------------|------------------------------------------------------------------------------------------------------------------------------------------------------------------------------------------------------|----------------------------------------------------------------------------------------------------------------------------------------------------------------------------------------------------------------------------------------------------------------------|---------------------------------------------------------------------------------------------------------------------------------------------------------------------------------|
| Criteria or guidelines | <ul style="list-style-type: none"> <li>Tentative Criteria of Diagnosis and Treatment for Human Brucellosis</li> <li>Tentative Rule of Criteria of Control Zone for Brucellosis and Evaluation Methods at County Level</li> </ul> | <ul style="list-style-type: none"> <li>Criteria of Diagnosis, Epidemic Area and Control Zone for Brucellosis</li> <li>Tentative Guidelines for National Brucellosis Sentinel Surveillance</li> </ul> | <ul style="list-style-type: none"> <li>Diagnostic Criteria and Principles of Management for Human Brucellosis (GB 15988-1995)</li> <li>Surveillance Standard for Brucellosis (GB16885-1997)</li> <li>Guidelines for Human Brucellosis Surveillance (2005)</li> </ul> | <ul style="list-style-type: none"> <li>Diagnostic Criteria for Brucellosis (WS 269-2007)</li> <li>Guidelines for Diagnosis and Treatment of Human Brucellosis (2012)</li> </ul> |
| Issued by              | The Leading Group Office of Endemic Diseases Prevention and Control in Northern (1960–1986), the CPC Central Committee, PRC                                                                                                      | The Ministry of Agriculture and the Ministry of Health, PRC                                                                                                                                          | The State Bureau of Technical Supervision, and the Ministry of Health, PRC                                                                                                                                                                                           | The Ministry of Health, PRC                                                                                                                                                     |
| Date issued            | 1977 Sep and 1981, respectively                                                                                                                                                                                                  | 1988 Oct 25 and 1990, respectively                                                                                                                                                                   | 1996 Jan 23, 1997 Jun 16, and 2005 Jul 26, respectively                                                                                                                                                                                                              | 2007 Apr 17 and 2012 Oct 8, respectively                                                                                                                                        |

| Variable                                    | 1977 Sep–1988 Sep                                                                                                                                                                                                                                                                                                                                                                                                                                                                                                                                                                                                                                                                                                                                                                                                                                                                                                                                                                                                                                                                                                                                                                                                                                                                                                                                                                                                                                                                                                                                                                                                                                                                                                                                           | 1988 Oct–1996 Jun                                                                                                                                    | 1996 Jul–2007 Oct                                                                                                                                    | 2007 Oct–current                                                                                                                                                                                                                         |
|---------------------------------------------|-------------------------------------------------------------------------------------------------------------------------------------------------------------------------------------------------------------------------------------------------------------------------------------------------------------------------------------------------------------------------------------------------------------------------------------------------------------------------------------------------------------------------------------------------------------------------------------------------------------------------------------------------------------------------------------------------------------------------------------------------------------------------------------------------------------------------------------------------------------------------------------------------------------------------------------------------------------------------------------------------------------------------------------------------------------------------------------------------------------------------------------------------------------------------------------------------------------------------------------------------------------------------------------------------------------------------------------------------------------------------------------------------------------------------------------------------------------------------------------------------------------------------------------------------------------------------------------------------------------------------------------------------------------------------------------------------------------------------------------------------------------|------------------------------------------------------------------------------------------------------------------------------------------------------|------------------------------------------------------------------------------------------------------------------------------------------------------|------------------------------------------------------------------------------------------------------------------------------------------------------------------------------------------------------------------------------------------|
| Date enforced                               | 1977 Sep and 1981, respectively                                                                                                                                                                                                                                                                                                                                                                                                                                                                                                                                                                                                                                                                                                                                                                                                                                                                                                                                                                                                                                                                                                                                                                                                                                                                                                                                                                                                                                                                                                                                                                                                                                                                                                                             | 25 October 1988 and 1990 respectively                                                                                                                | 1996 Jul 1, 1998 Jan 1, and 2005 Jul 26, respectively                                                                                                | 2007 Oct 15 and 2012 Oct 8, respectively                                                                                                                                                                                                 |
| Compared to previous criteria or guidelines | This the first criteria for human brucellosis issued in China                                                                                                                                                                                                                                                                                                                                                                                                                                                                                                                                                                                                                                                                                                                                                                                                                                                                                                                                                                                                                                                                                                                                                                                                                                                                                                                                                                                                                                                                                                                                                                                                                                                                                               | An updated version of previous criteria (left): revised the diagnosis and added the diagnosis criteria of brucellosis in animals                     | National standards based on previous criteria (left), including the specifications of the laboratory tests for human brucellosis                     | Based on previous criteria (left), the new national standard and guideline improve the diagnosis and case classification and laboratory tests                                                                                            |
| Epidemiologic linkage                       | 1.1 Before the onset of illness, the case-patient had a history of close contact with suspected/confirmed animal cases, contaminated animal products, or cultures of <i>Brucella</i> spp.; or living in brucellosis-endemic areas; or closely connected with the produce, use, and research of vaccine of <i>Brucella</i> spp.                                                                                                                                                                                                                                                                                                                                                                                                                                                                                                                                                                                                                                                                                                                                                                                                                                                                                                                                                                                                                                                                                                                                                                                                                                                                                                                                                                                                                              |                                                                                                                                                      |                                                                                                                                                      |                                                                                                                                                                                                                                          |
| Clinical description                        | 2.1 Present with undulant, continued, intermittent, or irregular fever (including low fever) of variable duration (some days or weeks), with profuse sweating, fatigue, muscle pain, arthralgia, etc. Lymphadenia, splenomegaly, and hepatomegaly, Orchitis and epididymitis are common, but small numbers of patients may have jaundice and a variety of rashes; osteoarticular complications are common in patients at chronic phase.                                                                                                                                                                                                                                                                                                                                                                                                                                                                                                                                                                                                                                                                                                                                                                                                                                                                                                                                                                                                                                                                                                                                                                                                                                                                                                                     |                                                                                                                                                      |                                                                                                                                                      |                                                                                                                                                                                                                                          |
| Laboratory tests                            | <p>3.1 Presumptive diagnosis</p> <ul style="list-style-type: none"> <li>• Positive results of plate agglutination test or Bengal plate agglutination test: 0.03 mL serum (++) (criteria used since 1988); or 0.02 mL serum (++) (criteria used during September 1977- September 1988).</li> <li>• Intradermal allergic reaction test by 0.1 mL brucellin: skin redness and infiltration range <math>\geq 2.0</math> cm <math>\times</math> 2.0 cm or 4.0 cm<sup>2</sup> observed at 24 h or 48 h (since July 1996); or <math>\geq 2.5</math> cm <math>\times</math> 2.5 cm or 6.25 cm<sup>2</sup> observed at 24 h or 48 h (during October 1988–June 1996); or <math>\geq 2.5</math> cm <math>\times</math> 2.5 cm observed at 48 h (during September 1977–September 1988).</li> </ul> <p>3.2 Serologic diagnosis</p> <ul style="list-style-type: none"> <li>• Standard tube agglutination test: <math>\geq 1:100^{++}</math> in titer; or <math>\geq 1:50^{++}</math> in titer for the patient with course over 1 year (since October 2007); or <math>\geq 4</math>-fold rise in titer in the paired serum samples after 2–4 weeks of the first test <math>\geq 1:100^{++}</math> in titer of the patients with a history of <i>Brucella</i> vaccination within half year (since July 1996).</li> <li>• Complement fixation test: <math>\geq 1:10^{++}</math> in titer.</li> <li>• Coomb's test: <math>\geq 1:400^{++}</math> in titer (since October 1988); <math>\geq 1:200^{++}</math> in titer (during September 1977–September 1988).</li> <li>• Cysteine test: <math>\geq 1:25^{++}</math> in titer (used only during September 1977–September 1988).</li> </ul> <p>3.3 Isolation of <i>Brucella</i> spp. from blood or other clinical specimen.</p> |                                                                                                                                                      |                                                                                                                                                      |                                                                                                                                                                                                                                          |
| Diagnosis and classification                | 4.1 Probable case: a patient with item 1.1 and 2.1.<br>4.2 Confirmed case: a probable case with at least 1 positive result of item 3.1–3.3.                                                                                                                                                                                                                                                                                                                                                                                                                                                                                                                                                                                                                                                                                                                                                                                                                                                                                                                                                                                                                                                                                                                                                                                                                                                                                                                                                                                                                                                                                                                                                                                                                 | 4.1 Probable case: a patient with item 1.1, 2.1, and 3.1.<br>4.2 Confirmed case: a probable case with at least 1 positive result of item 3.2 or 3.3. | 4.1 Probable case: a patient with item 1.1, 2.1, and 3.1.<br>4.2 Confirmed case: a probable case with at least 1 positive result of item 3.2 or 3.3. | 4.1 Suspected case: a patient with item 1.1 and 2.1.<br>4.2 Probable case: a suspected case with at least 1 positive result of item 3.1.<br>4.3 Confirmed case: a suspected or probable case with at least 1 positive result of item 3.2 |

| Variable | 1977 Sep–1988 Sep | 1988 Oct–1996 Jun | 1996 Jul–2007 Oct | 2007 Oct–current                                                                                                                 |
|----------|-------------------|-------------------|-------------------|----------------------------------------------------------------------------------------------------------------------------------|
|          |                   |                   |                   | or 3.3.<br>4.4 Latent infection: a person with item 1.1 and at least 1 positive result of item 3.2 or 3.3, but without item 2.1. |

\*There were not criteria/guidelines for human brucellosis diagnosis issued by the Chinese national health authorities during 1950–1976, but human brucellosis cases are diagnosed by clinical manifestations, epidemiologic links, and/or available laboratory tests at that time including intradermal allergic reaction test, agglutination test and culture, and so on. CPC, Communist Party of China; GB, Guo-Biao (National Standard); PRC, People's Republic of China; WS, Wei-Sheng (Standard in Public Health).

**Technical Appendix Table 5.** Summary of the geography of each province in mainland China

| No. | Province       | Zone code | Climate*       | Inland or coastal province | Northern or southern* | Adjacent country                                                                       | Capital city | Latitude† | Longitude |
|-----|----------------|-----------|----------------|----------------------------|-----------------------|----------------------------------------------------------------------------------------|--------------|-----------|-----------|
| 1   | Heilongjiang   | 230000    | Mid-temperate  | Inland                     | Northern              | Russia                                                                                 | Harbin       | 46.1138   | 126.185   |
| 2   | Jilin          | 220000    | Mid-temperate  | Inland                     | Northern              | Russia and North Korea                                                                 | Changchun    | 44.1156   | 125.352   |
| 3   | Xinjiang       | 650000    | Mid-temperate  | Inland                     | Northern              | Russia, Mongolia, Kazakhstan, Kyrgyzstan, Tajikistan, Afghanistan, Pakistan, and India | Urumqi       | 43.7878   | 87.574    |
| 4   | Inner Mongolia | 150000    | Mid-temperate  | Inland                     | Northern              | Russia and Mongolia                                                                    | Hohhot       | 40.7632   | 110.82    |
| 5   | Liaoning       | 210000    | Warm-temperate | Coastal                    | Northern              | North Korea                                                                            | Shenyang     | 40.6843   | 122.589   |
| 6   | Beijing        | 110000    | Warm-temperate | Inland                     | Northern              | None                                                                                   | Beijing      | 39.94     | 116.41    |
| 7   | Tianjin        | 120000    | Warm-temperate | Coastal                    | Northern              | None                                                                                   | Tianjin      | 39.16     | 117.2     |
| 8   | Hebei          | 130000    | Warm-temperate | Coastal                    | Northern              | None                                                                                   | Shijiazhuang | 38.1269   | 115.078   |
| 9   | Shanxi         | 140000    | Warm-temperate | Inland                     | Northern              | None                                                                                   | Taiyuan      | 37.8098   | 112.8     |
| 10  | Ningxia        | 640000    | Mid-temperate  | Inland                     | Northern              | None                                                                                   | Yinchuan     | 37.6234   | 106.026   |
| 11  | Qinghai        | 630000    | Cold           | Inland                     | Northern              | None                                                                                   | Xining       | 36.6401   | 101.835   |
| 12  | Shandong       | 370000    | Warm-temperate | Coastal                    | Northern              | None                                                                                   | Jinan        | 36.313    | 118.368   |
| 13  | Gansu          | 620000    | Mid-temperate  | Inland                     | Northern              | Mongolia                                                                               | Lanzhou      | 35.5751   | 104.657   |
| 14  | Henan          | 410000    | Warm-temperate | Inland                     | Northern              | None                                                                                   | Zhengzhou    | 34.707    | 113.058   |
| 15  | Shaanxi        | 610000    | Warm-temperate | Inland                     | Northern              | None                                                                                   | Xi'an        | 34.3038   | 108.849   |
| 16  | Tibet          | 540000    | Cold           | Inland                     | Northern              | India, Bhutan, Nepal, Myanmar, and Pakistan                                            | Lhasa        | 29.65     | 91.13     |
| 17  | Jiangsu        | 320000    | Subtropical    | Coastal                    | Southern              | None                                                                                   | Nanjing      | 32.8614   | 118.575   |
| 18  | Anhui          | 340000    | Subtropical    | Inland                     | Southern              | None                                                                                   | Hefei        | 31.8527   | 117.543   |
| 19  | Shanghai       | 310000    | Subtropical    | Coastal                    | Southern              | None                                                                                   | Shanghai     | 31.28     | 121.46    |
| 20  | Hubei          | 420000    | Subtropical    | Inland                     | Southern              | None                                                                                   | Wuhan        | 30.8781   | 112.606   |
| 21  | Sichuan        | 510000    | Subtropical    | Inland                     | Southern              | None                                                                                   | Chengdu      | 30.2459   | 103.978   |
| 22  | Zhejiang       | 330000    | Subtropical    | Coastal                    | Southern              | None                                                                                   | Hangzhou     | 29.9769   | 120.444   |

|    |           |        |             |         |          |                            |           |         |         |
|----|-----------|--------|-------------|---------|----------|----------------------------|-----------|---------|---------|
| 23 | Chongqing | 500000 | Subtropical | Inland  | Southern | None                       | Chongqing | 29.59   | 106.55  |
| 24 | Jiangxi   | 360000 | Subtropical | Inland  | Southern | None                       | Nanchang  | 28.2274 | 115.261 |
| 25 | Hunan     | 430000 | Subtropical | Inland  | Southern | None                       | Changsha  | 27.3878 | 113.006 |
| 26 | Guizhou   | 520000 | Subtropical | Inland  | Southern | None                       | Guiyang   | 27.3627 | 106.816 |
| 27 | Fujian    | 350000 | Subtropical | Coastal | Southern | None                       | Fuzhou    | 25.337  | 118.827 |
| 28 | Yunnan    | 530000 | Subtropical | Inland  | Southern | Vietnam, Laos, and Myanmar | Kunming   | 24.8119 | 103.034 |
| 29 | Guangdong | 440000 | Subtropical | Coastal | Southern | None                       | Guangzhou | 22.9286 | 113.414 |
| 30 | Guangxi   | 450000 | Subtropical | Coastal | Southern | Vietnam                    | Nanning   | 22.85   | 108.37  |
| 31 | Hainan    | 460000 | Tropical    | Coastal | Southern | None                       | Haikou    | 19.5855 | 110.101 |

\*The general climate of each province, which is available on the website of China Meteorological Administration (<http://www.cma.gov.cn/>). Each province is categorized as temperate northern province (16 provinces) or subtropical southern province (15 provinces) from previous study (Feng L, et al. Influenza-associated mortality in temperate and subtropical Chinese cities, 2003-2008. Bull World Health Organ. 2012;90:279–88).

†The latitude and longitude of capital city of each province.

**Technical Appendix Table 6.** Demographic and epidemiologic characteristics of human brucellosis cases, mainland China, 2004–2014\*

| Characteristic                  | Total, N = 346,682 | Male, n = 258,238 | Female, n = 88,444 |
|---------------------------------|--------------------|-------------------|--------------------|
| <b>Type of case</b>             |                    |                   |                    |
| Confirmed                       | 314,694 (90.8)     | 233,615 (90.5)    | 81,079 (91.7)      |
| Probable                        | 31,988 (9.2)       | 24,623 (9.5)      | 7,365 (8.3)        |
| <b>Age, y</b>                   |                    |                   |                    |
| Median (IQR)                    | 44.0 (34.1–53.9)   | 43.9 (34.0–53.7)  | 45.0 (35.0–54.0)   |
| <b>Age group</b>                |                    |                   |                    |
| 0–4                             | 2,424 (0.7)        | 1,446 (0.6)       | 978 (1.1)          |
| 5–14                            | 6,638 (1.9)        | 4,401 (1.7)       | 2,237 (2.5)        |
| 15–24                           | 25,262 (7.3)       | 19,800 (7.7)      | 5,462 (6.2)        |
| 25–34                           | 57,651 (16.6)      | 44,407 (17.2)     | 13,244 (15)        |
| 35–44                           | 90,777 (26.2)      | 68,185 (26.4)     | 22,592 (25.5)      |
| 45–54                           | 87,566 (25.3)      | 63,824 (24.7)     | 23,742 (26.8)      |
| 55–64                           | 57,274 (16.5)      | 41,837 (16.2)     | 15,437 (17.5)      |
| ≥65                             | 19,090 (5.5)       | 14,338 (5.6)      | 4,752 (5.4)        |
| <b>Year of onset</b>            |                    |                   |                    |
| 2004                            | 11,477 (3.3)       | 8,818 (3.4)       | 2,659 (3.0)        |
| 2005                            | 18,416 (5.3)       | 13,972 (5.4)      | 4,444 (5.0)        |
| 2006                            | 19,014 (5.5)       | 14,359 (5.6)      | 4,655 (5.3)        |
| 2007                            | 19,723 (5.7)       | 14,773 (5.7)      | 4,950 (5.6)        |
| 2008                            | 27,771 (8.0)       | 20,672 (8)        | 7,099 (8.0)        |
| 2009                            | 35,824 (10.3)      | 26,421 (10.2)     | 9,403 (10.6)       |
| 2010                            | 33,786 (9.7)       | 24,822 (9.6)      | 8,964 (10.1)       |
| 2011                            | 38,183 (11.0)      | 28,552 (11.1)     | 9,631 (10.9)       |
| 2012                            | 39,607 (11.4)      | 29,869 (11.6)     | 9,738 (11.0)       |
| 2013                            | 44,739 (12.9)      | 33,068 (12.8)     | 11,671 (13.2)      |
| 2014                            | 58,142 (16.8)      | 42,912 (16.6)     | 15,230 (17.2)      |
| <b>Month of onset</b>           |                    |                   |                    |
| January                         | 22,315 (6.4)       | 16,898 (6.5)      | 5,417 (6.1)        |
| February                        | 26,571 (7.7)       | 20,585 (8.0)      | 5,986 (6.8)        |
| March                           | 37,061 (10.7)      | 28,451 (11.0)     | 8,610 (9.7)        |
| April                           | 43,402 (12.5)      | 33,203 (12.9)     | 10,199 (11.5)      |
| May                             | 49,472 (14.3)      | 37,488 (14.5)     | 11,984 (13.5)      |
| June                            | 45,588 (13.1)      | 33,788 (13.1)     | 11,800 (13.3)      |
| July                            | 37,827 (10.9)      | 27,390 (10.6)     | 10,437 (11.8)      |
| August                          | 27,659 (8.0)       | 19,840 (7.7)      | 7,819 (8.8)        |
| September                       | 16,786 (4.8)       | 11,880 (4.6)      | 4,906 (5.5)        |
| October                         | 14,677 (4.2)       | 10,416 (4.0)      | 4,261 (4.8)        |
| November                        | 13,555 (3.9)       | 9,738 (3.8)       | 3,817 (4.3)        |
| December                        | 11,769 (3.4)       | 8,561 (3.3)       | 3,208 (3.6)        |
| <b>Median delay, d (IQR)</b>    |                    |                   |                    |
| From illness onset to diagnosis | 20.0 (7.5–42.0)    | 20.0 (7.7–42.0)   | 19.8 (6.8–42.6)    |



| Characteristic                     | Total, N = 346,682 | Male, n = 258,238 | Female, n = 88,444 |
|------------------------------------|--------------------|-------------------|--------------------|
| From diagnosis to report           | 0.25 (0.04–0.65)   | 0.24 (0.04–0.65)  | 0.25 (0.04–0.65)   |
| From illness onset to report       | 20.6 (7.8–43.4)    | 20.7 (8.4–43.3)   | 20.5 (7.4–43.6)    |
| Where were the cases imported from |                    |                   |                    |
| The same county                    | 205,941 (59.4)     | 153,231 (59.3)    | 52,710 (59.6)      |
| Other county of same prefecture    | 92,351 (26.6)      | 68,584 (26.6)     | 23,767 (26.9)      |
| Other prefecture of same province  | 32,584 (9.4)       | 24,415 (9.5)      | 8,169 (9.2)        |
| Other province                     | 15,806 (4.6)       | 12,008 (4.6)      | 3,798 (4.3)        |

\*Data are presented as no. (%) patients unless otherwise indicated. IQR, interquartile range.

**Technical Appendix Table 7.** Summary of standard of brucellosis control, mainland China

| County-level category           | Criteria*                                                                                                                                                                                                                                                                                                                                                                                                                                                                                                                                                                                                                                                                                                                                                                                                                                                                                 |
|---------------------------------|-------------------------------------------------------------------------------------------------------------------------------------------------------------------------------------------------------------------------------------------------------------------------------------------------------------------------------------------------------------------------------------------------------------------------------------------------------------------------------------------------------------------------------------------------------------------------------------------------------------------------------------------------------------------------------------------------------------------------------------------------------------------------------------------------------------------------------------------------------------------------------------------|
| Criteria of control area        | <p>Meeting the following 3 requirements at least 2 consecutive years:</p> <ol style="list-style-type: none"> <li>1. For livestock vaccinated &gt;18 months of age or without vaccination, sampling &gt;3,000 serum samples in pastoral areas, &gt;1,000 serum samples in agricultural areas and semiagricultural and semipastoral areas, and detected by tube agglutination test (seropositive &lt;0.5% for sheep, goats, and deer, &lt;1% for cattle, and &lt;2% for pigs) or complement fixation test (&lt;0.5%).</li> <li>2. Sampling &gt;200 (total) abortion specimens from sheep, goats, cattle, and pigs (if the number of abortions is insufficient, sampling normal placenta, breast milk, vaginal secretions, or spleen), and without <i>Brucella</i> spp. detected.</li> <li>3. All animals infected with <i>Brucella</i> have been culled with biosafety disposal.</li> </ol> |
| Criteria of stable control area | <p>Meeting the following 3 requirements at least 3 consecutive years using the same requirement of sampling and laboratory tests in the criteria of control area:</p> <ol style="list-style-type: none"> <li>1. Seropositive &lt;0.1% for sheep or goats, &lt;0.3% for pigs, &lt;0.2% for cattle and deer.</li> <li>2. No <i>Brucella</i> detected from specimens of sheep, goats, cattle, and pigs.</li> <li>3. All animals infected with <i>Brucella</i> have been culled with biosafety disposal.</li> </ol>                                                                                                                                                                                                                                                                                                                                                                           |
| Criteria of decontaminated area | <p>Meeting the following 2 requirements at least 2 consecutive years using the same requirement of sampling and laboratory tests in the criteria of control area:</p> <ol style="list-style-type: none"> <li>1. No outbreak of brucellosis within 2 years after meeting the criteria of stable control area.</li> <li>2. All specimens are negative by tube agglutination test or complement fixation test.</li> </ol>                                                                                                                                                                                                                                                                                                                                                                                                                                                                    |

\*The Ministry of Agriculture, People's Republic of China. Technical specification of brucellosis control and prevention. 2006 [cited 2015 Aug 28].

<http://www.moa.gov.cn/zwl/m/nybz/200803/P020080429675112156434.doc>

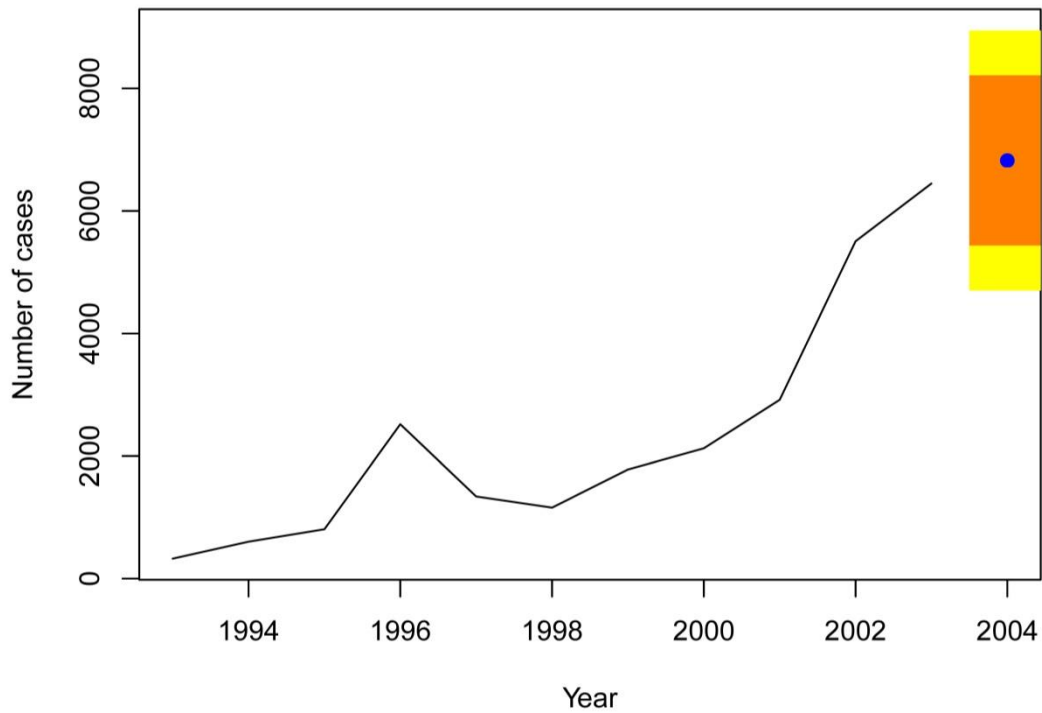

**Technical Appendix Figure 1.** Prediction value (6,823) for the number of human brucellosis cases in 2004 by the Holt's exponential smoothing method. The 80% CIs (orange) and 95% CIs (yellow) of the prediction value are 5,436–8,211 and 4,701–8,945 cases respectively. Comparing to this upper limited value (8,945) of the 95% CI, the actual number of cases (11,477) in 2004 has an excess proportion of 22.1%.

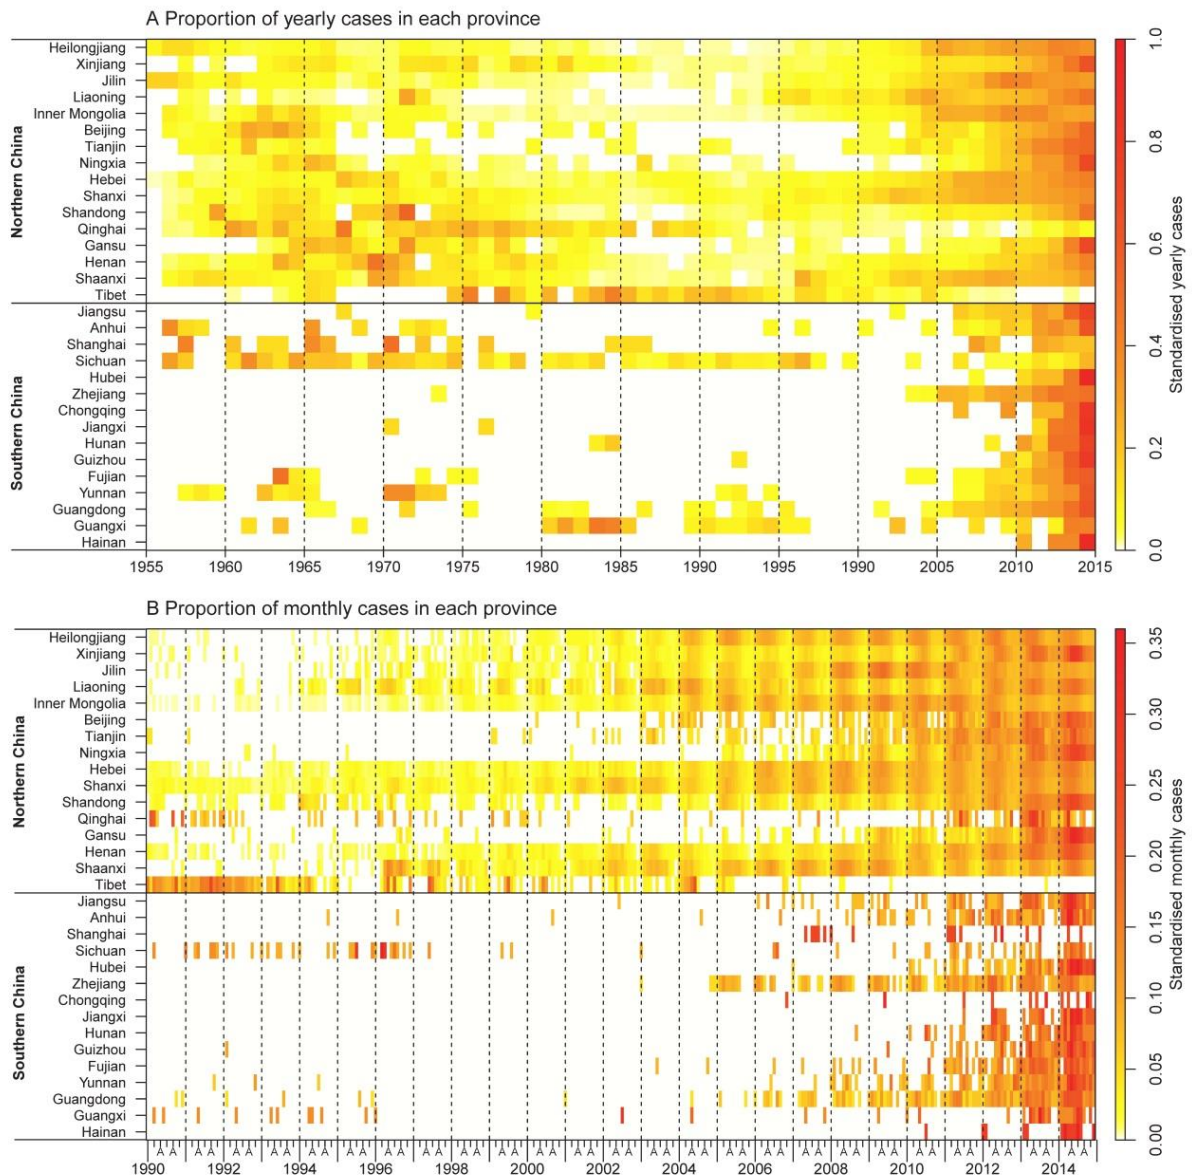

**Technical Appendix Figure 2.** Heat map of human brucellosis cases, by province, sorted by north and south and the latitude of capital city of each province, mainland China. A) Time series of the annual number of human brucellosis cases by province during 1955–2014, standardized by the total number of cases in each province. B) Time series of the monthly number of human brucellosis cases by province during 1990–2014, standardized by the total number of cases in each province.
